# Supplementary material
Source: HighWire-hosted journal article supplement (https://gh.bmj.com/content/suppl/2018/05/02/3.Suppl_2)
Supplement: ToC.pdf [file ToC.pdf]

# TABLE OF CONTENTS

## Volume 3 Supplement 2

### Editorials

Digital health in South Africa: innovating to improve health

---

Digital health vision: could MomConnect provide a pragmatic starting point for achieving universal health coverage in South Africa and elsewhere?

---

### Commentary

Achieving scale, sustainability and impact: a donor perspective on a mobile health messaging service and help desk (MomConnect) for South African mothers

---

### Analysis

Mobile health messaging service and helpdesk for South African mothers (MomConnect): history, successes and challenges

---

Designing for scale: optimising the health information system architecture for mobile maternal health messaging in South Africa (MomConnect)

---

Unpacking the performance of a mobile health information messaging program for mothers (MomConnect) in South Africa: evidence on program reach and messaging exposure

---

Self-enrolment antenatal health promotion data as an adjunct to maternal clinical information systems in the Western Cape Province of South Africa

---

The MomConnect helpdesk: how an interactive mobile messaging programme is used by mothers in South Africa

---

Optimising mHealth helpdesk responsiveness in South Africa: towards automated message triage

---

User assessments and the use of information from MomConnect, a mobile phone text-based information service, by pregnant women and new mothers in South Africa

---

### Editorial

Taking digital health innovation to scale in South Africa: ten lessons from MomConnect

---
